# Supplementary material for: Lactoferrin Contributes a Renoprotective Effect in Acute Kidney Injury and Early Renal Fibrosis
Source: PubMed Central journal article supplement (PMC7284869; doi:10.3390/pharmaceutics12050434), 2020-05-08
Supplement: pharmaceutics-12-00434-s001.pdf [file pharmaceutics-12-00434-s001.pdf]

# Supplementary Materials: Lactoferrin Contributes a Renoprotective Effect in Acute Kidney Injury and Renal Fibrosis

Yung-Ho Hsu, I-Jen Chiu, Yuh-Feng Lin, Yi-Jie Chen, Yu-Hsuan Lee and Hui-Wen Chiu

**Table S1.** The identification of 62 overlay genes with 2-fold changes in the kidney tissues of AKI and CKD patients.

|          |           |         |       |        |        |         |
|----------|-----------|---------|-------|--------|--------|---------|
| ADAM9    | C16orf89  | C2orf54 | C7    | CDH6   | CFI    | CHI3L1  |
| COL14A1  | COPA      | CR2     | DPT   | EGF    | ELF5   | ESRRB   |
| FBXL21   | FGB       | FTCD    | GAD1  | GALM   | GDF15  | GGT6    |
| HAVCR1   | HOXB8     | HSP90B1 | ITLN1 | KLK1   | KNG1   | LCN2    |
| LGSN     | LINC00937 | LPP     | LTF   | LYZ    | MET    | MFAP5   |
| MT1E     | MT1F      | MT1M    | NNMT  | OGN    | OLFM4  | OSMR    |
| PAPPA    | PTN       | PVALB   | REN   | SEMA6D | SGK494 | SLC12A3 |
| SLC22A7  | SLC23A3   | SLC7A13 | SOST  | SOX9   | STAT1  | TEF     |
| TMEM106A | TPCN2     | TRPM3   | TRPM6 | USP2   | VCAM1  |         |

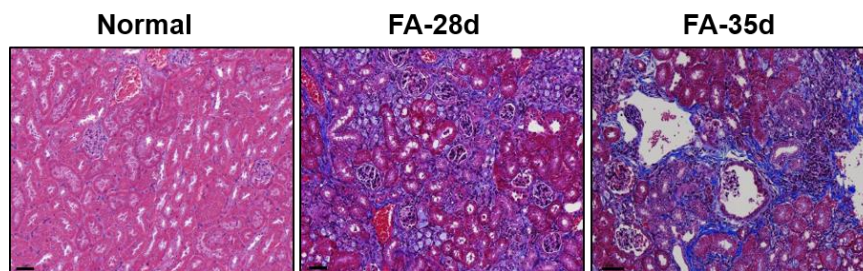

**Figure S1.** FA induces renal fibrosis. Representative kidney sections in mice were stained with Masson's trichrome staining and examined by microscopy. Scale bar = 60  $\mu$ m.

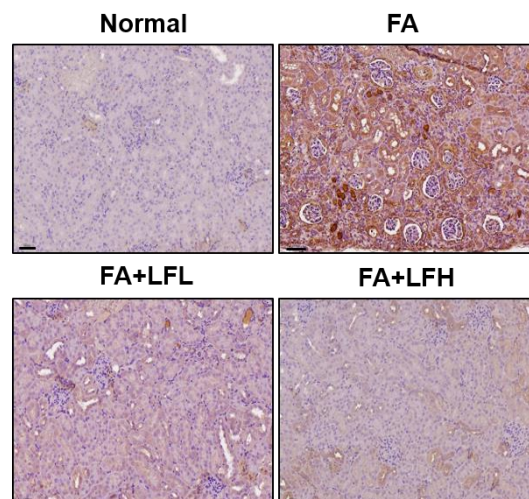

**Figure S2.** Immunohistochemistry (IHC) of fibrotic marker protein  $\alpha$ -SMA in kidney of FA mouse model. The protein expression of  $\alpha$ -SMA in the indicated groups of kidney sections. Scale bar = 60  $\mu$ m.
